# Supplementary material for: Reciprocal regulation of NagC and quorum sensing systems and their roles in hmsHFRS expression and biofilm formation in Yersinia pseudotuberculosis
Source: PubMed Central journal article supplement (PMC10634360; doi:10.1099/mic.0.001397), 2023-10-10
Supplement: mic-169-1397-s001.pdf [file mic-169-1397-s001.pdf]

# Supplementary Material

**Reciprocal regulation of NagC and Quorum Sensing systems and  
their roles in *hmsHFRS* expression and biofilm formation in  
*Yersinia pseudotuberculosis*.**

Anja Wiechmann, Vanina Garcia, Linzy Elton<sup>†</sup>, Paul Williams and Steve Atkinson\*

Biodiscovery Institute, School of Life Sciences, University of Nottingham, Nottingham,  
NG7 2RD, United Kingdom.

<sup>†</sup>Division of Infection and Immunity, University College, London, WC1E 6BT. United  
Kingdom.

\* Corresponding author

**A**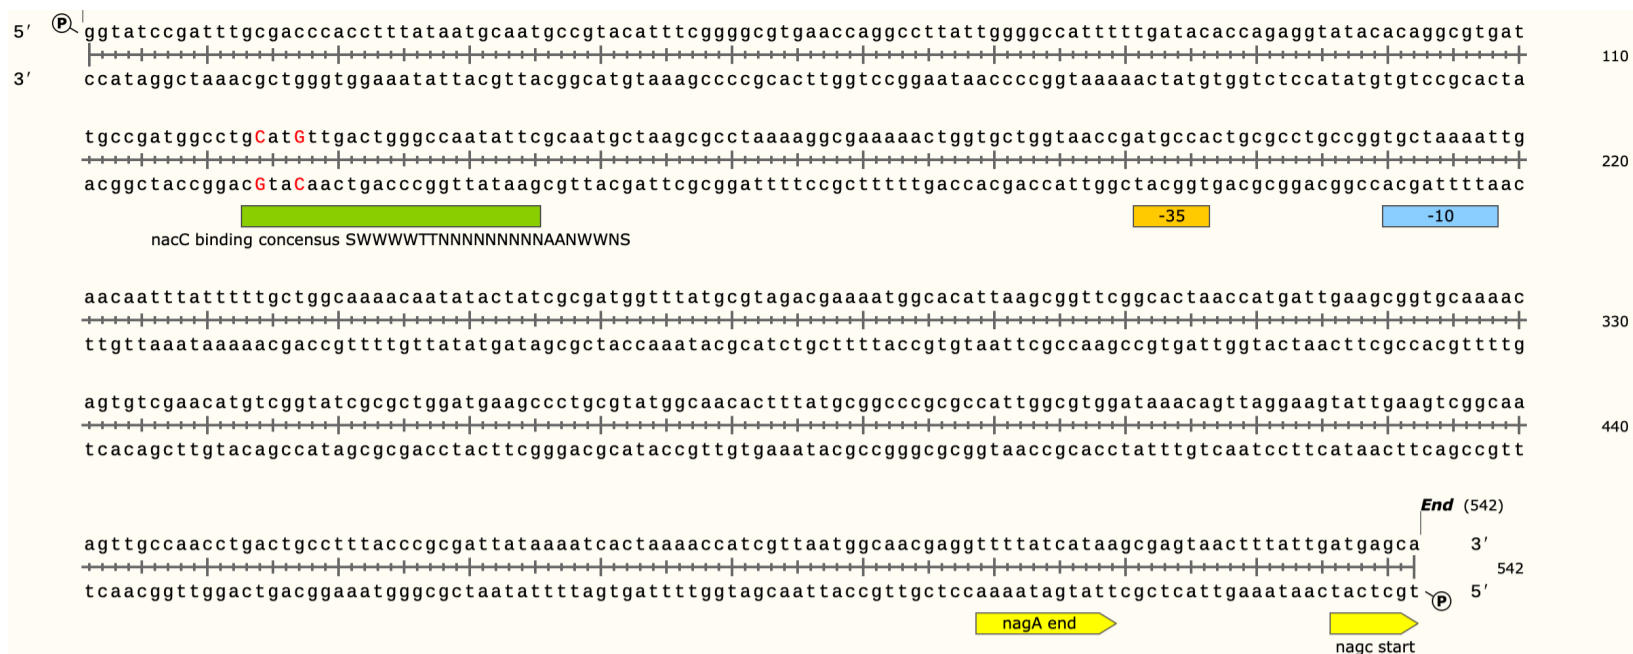**B****Expression of  $P_{nagC}::lux$  in the WT at 26°C**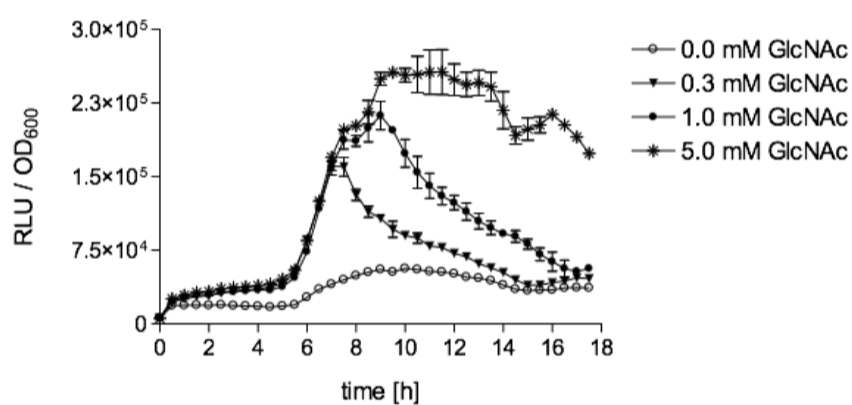**C****Expression of  $P_{nagC}::lux$  in the WT at 37°C**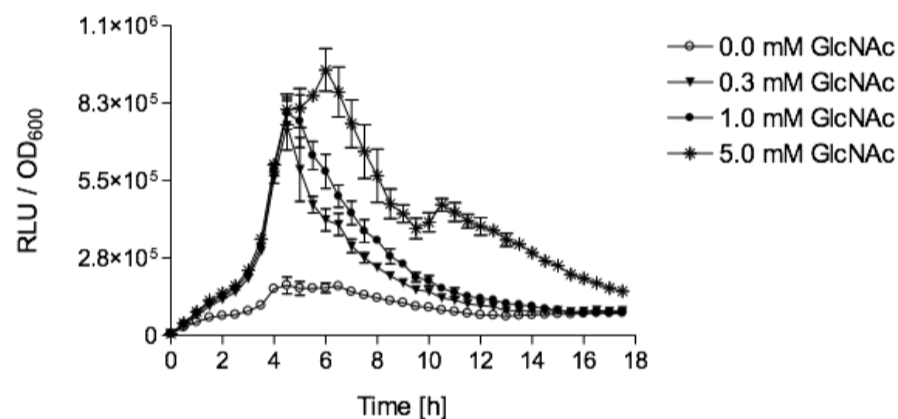**D****Expression of  $P_{nagC}::lux$  in  $\Delta nagC$  at 26°C**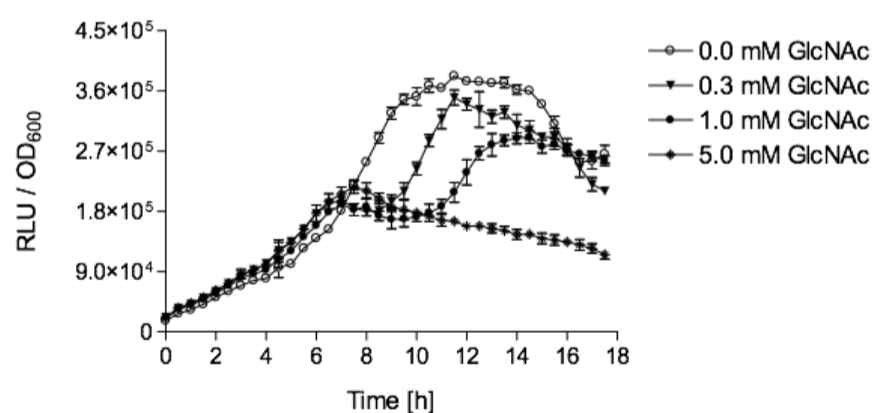**E****Expression of  $P_{nagC}::lux$  in  $\Delta nagC$  at 37°C**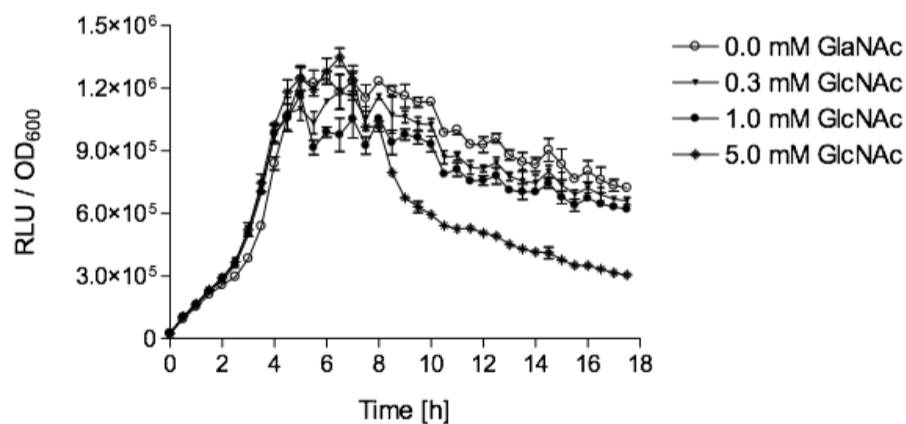

**Fig S1.** *Y. pseudotuberculosis nagC* possesses a putative *nagC* binding site (green box) in the *nagC* promoter region, with only 2 mismatches (red) to the consensus (A). Full expression profiles of NagC in the *Y. pseudotuberculosis* parent (WT) and *nagC* mutant with increasing concentrations of GlcNAc at 26°C and 37°C (B).

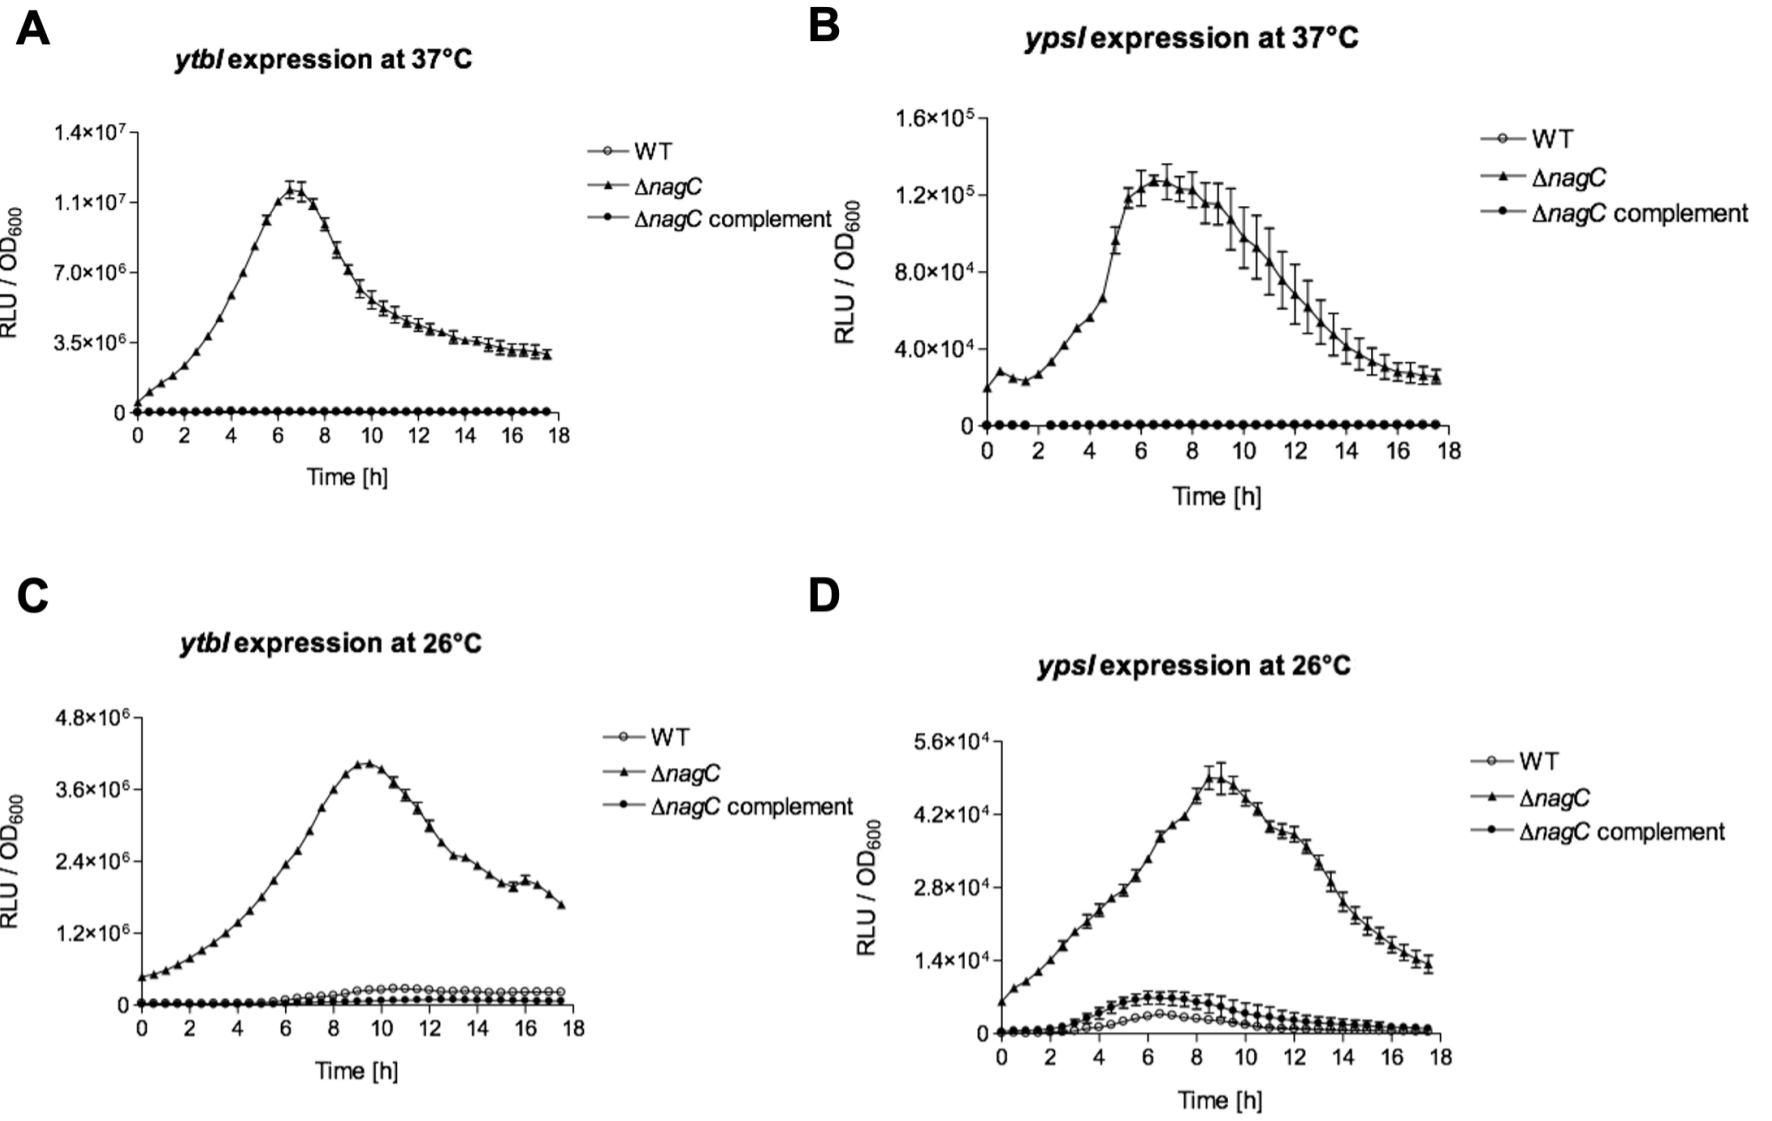

**Fig S2.** Full expression profiles of *ytbI* and *ypsI* in the *Y. pseudotuberculosis* parent (WT), *nagC* mutant and complement at 26°C and 37°C (A-D).

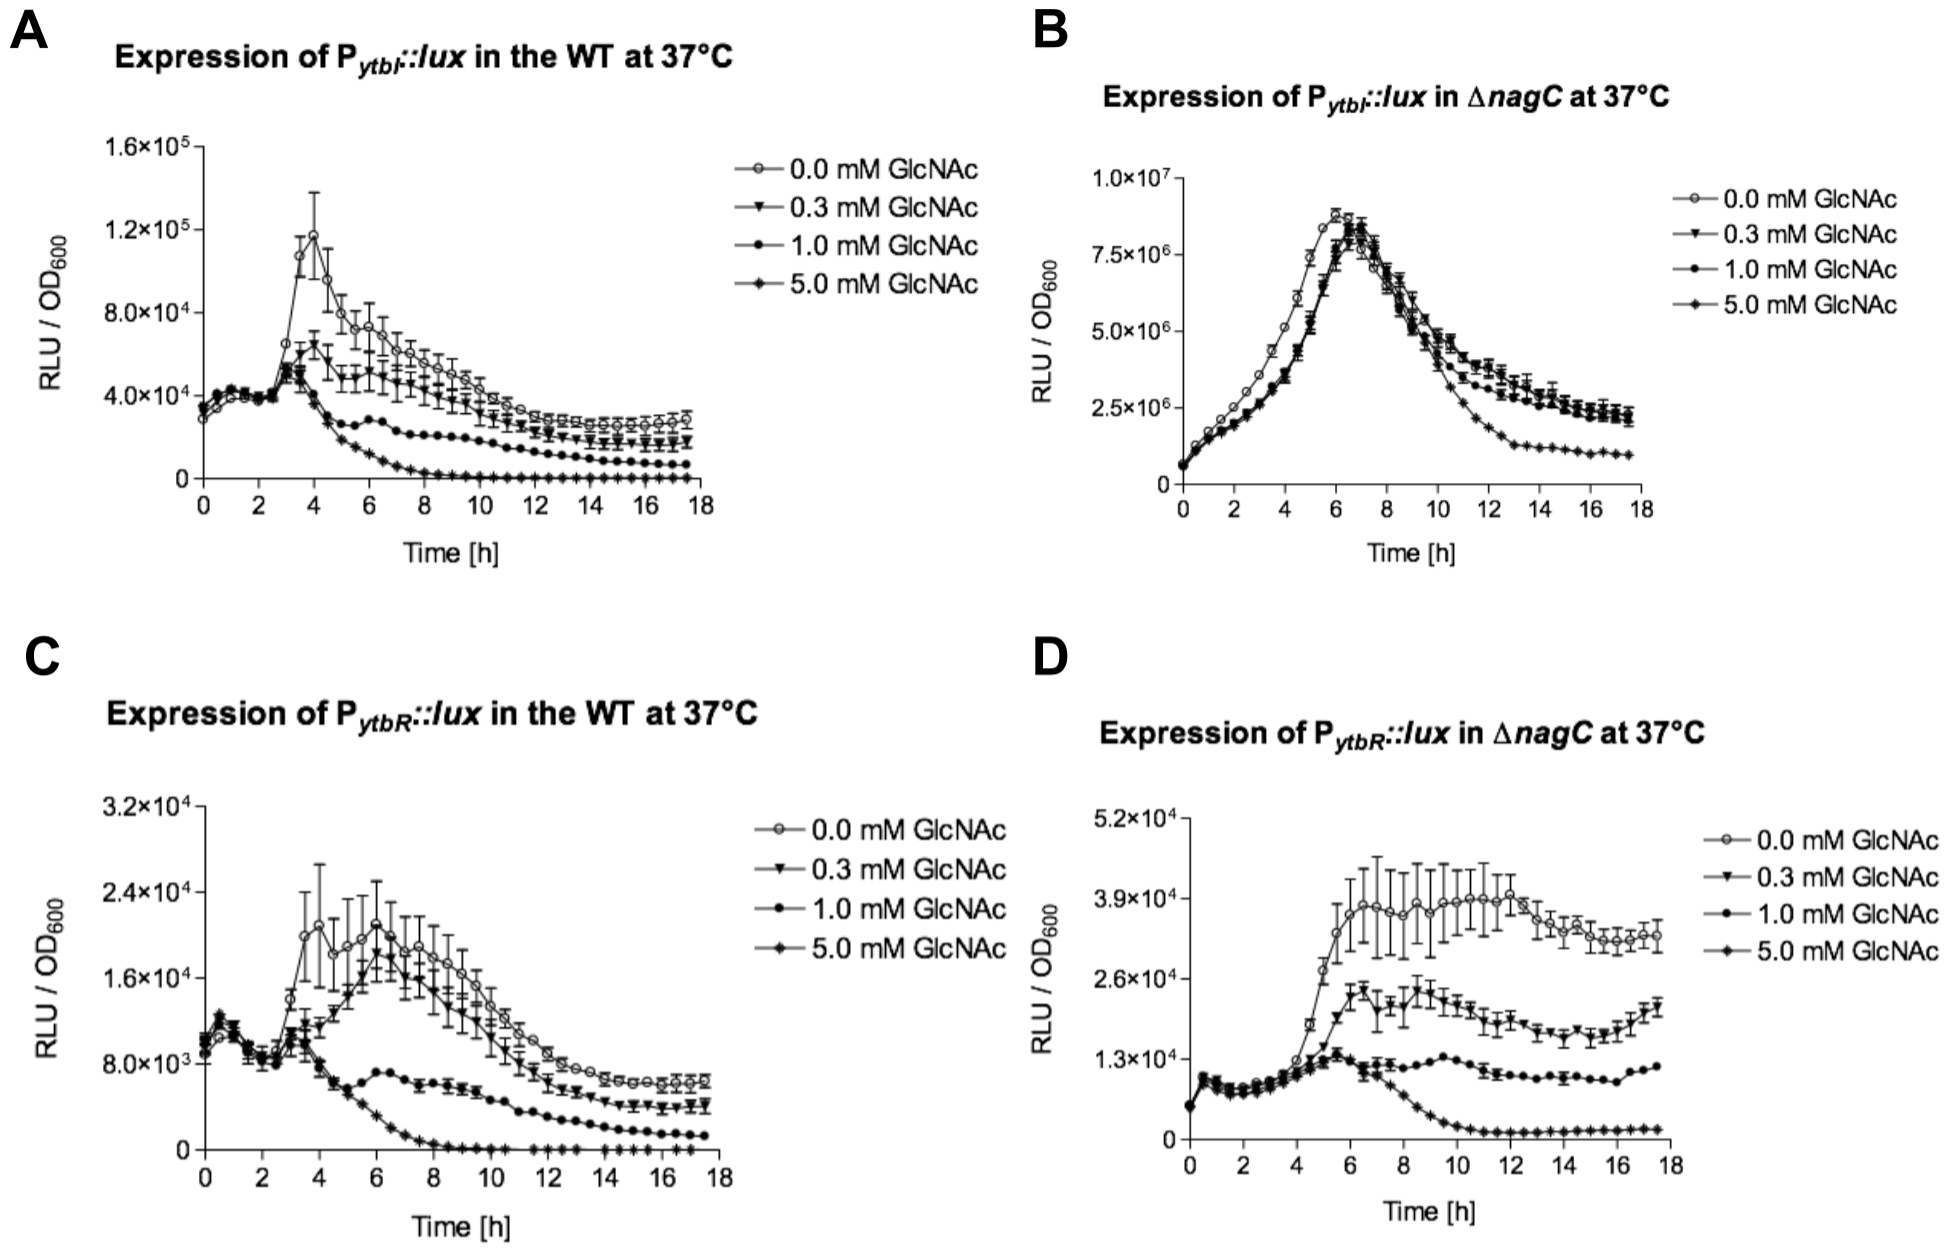

**Fig S3.** Full expression profiles of *ytl* and *ytlR* in the *Y. pseudotuberculosis* parent (WT) and *nagC* mutant in increasing GlcNAc concentrations at 37°C (**A-D**).

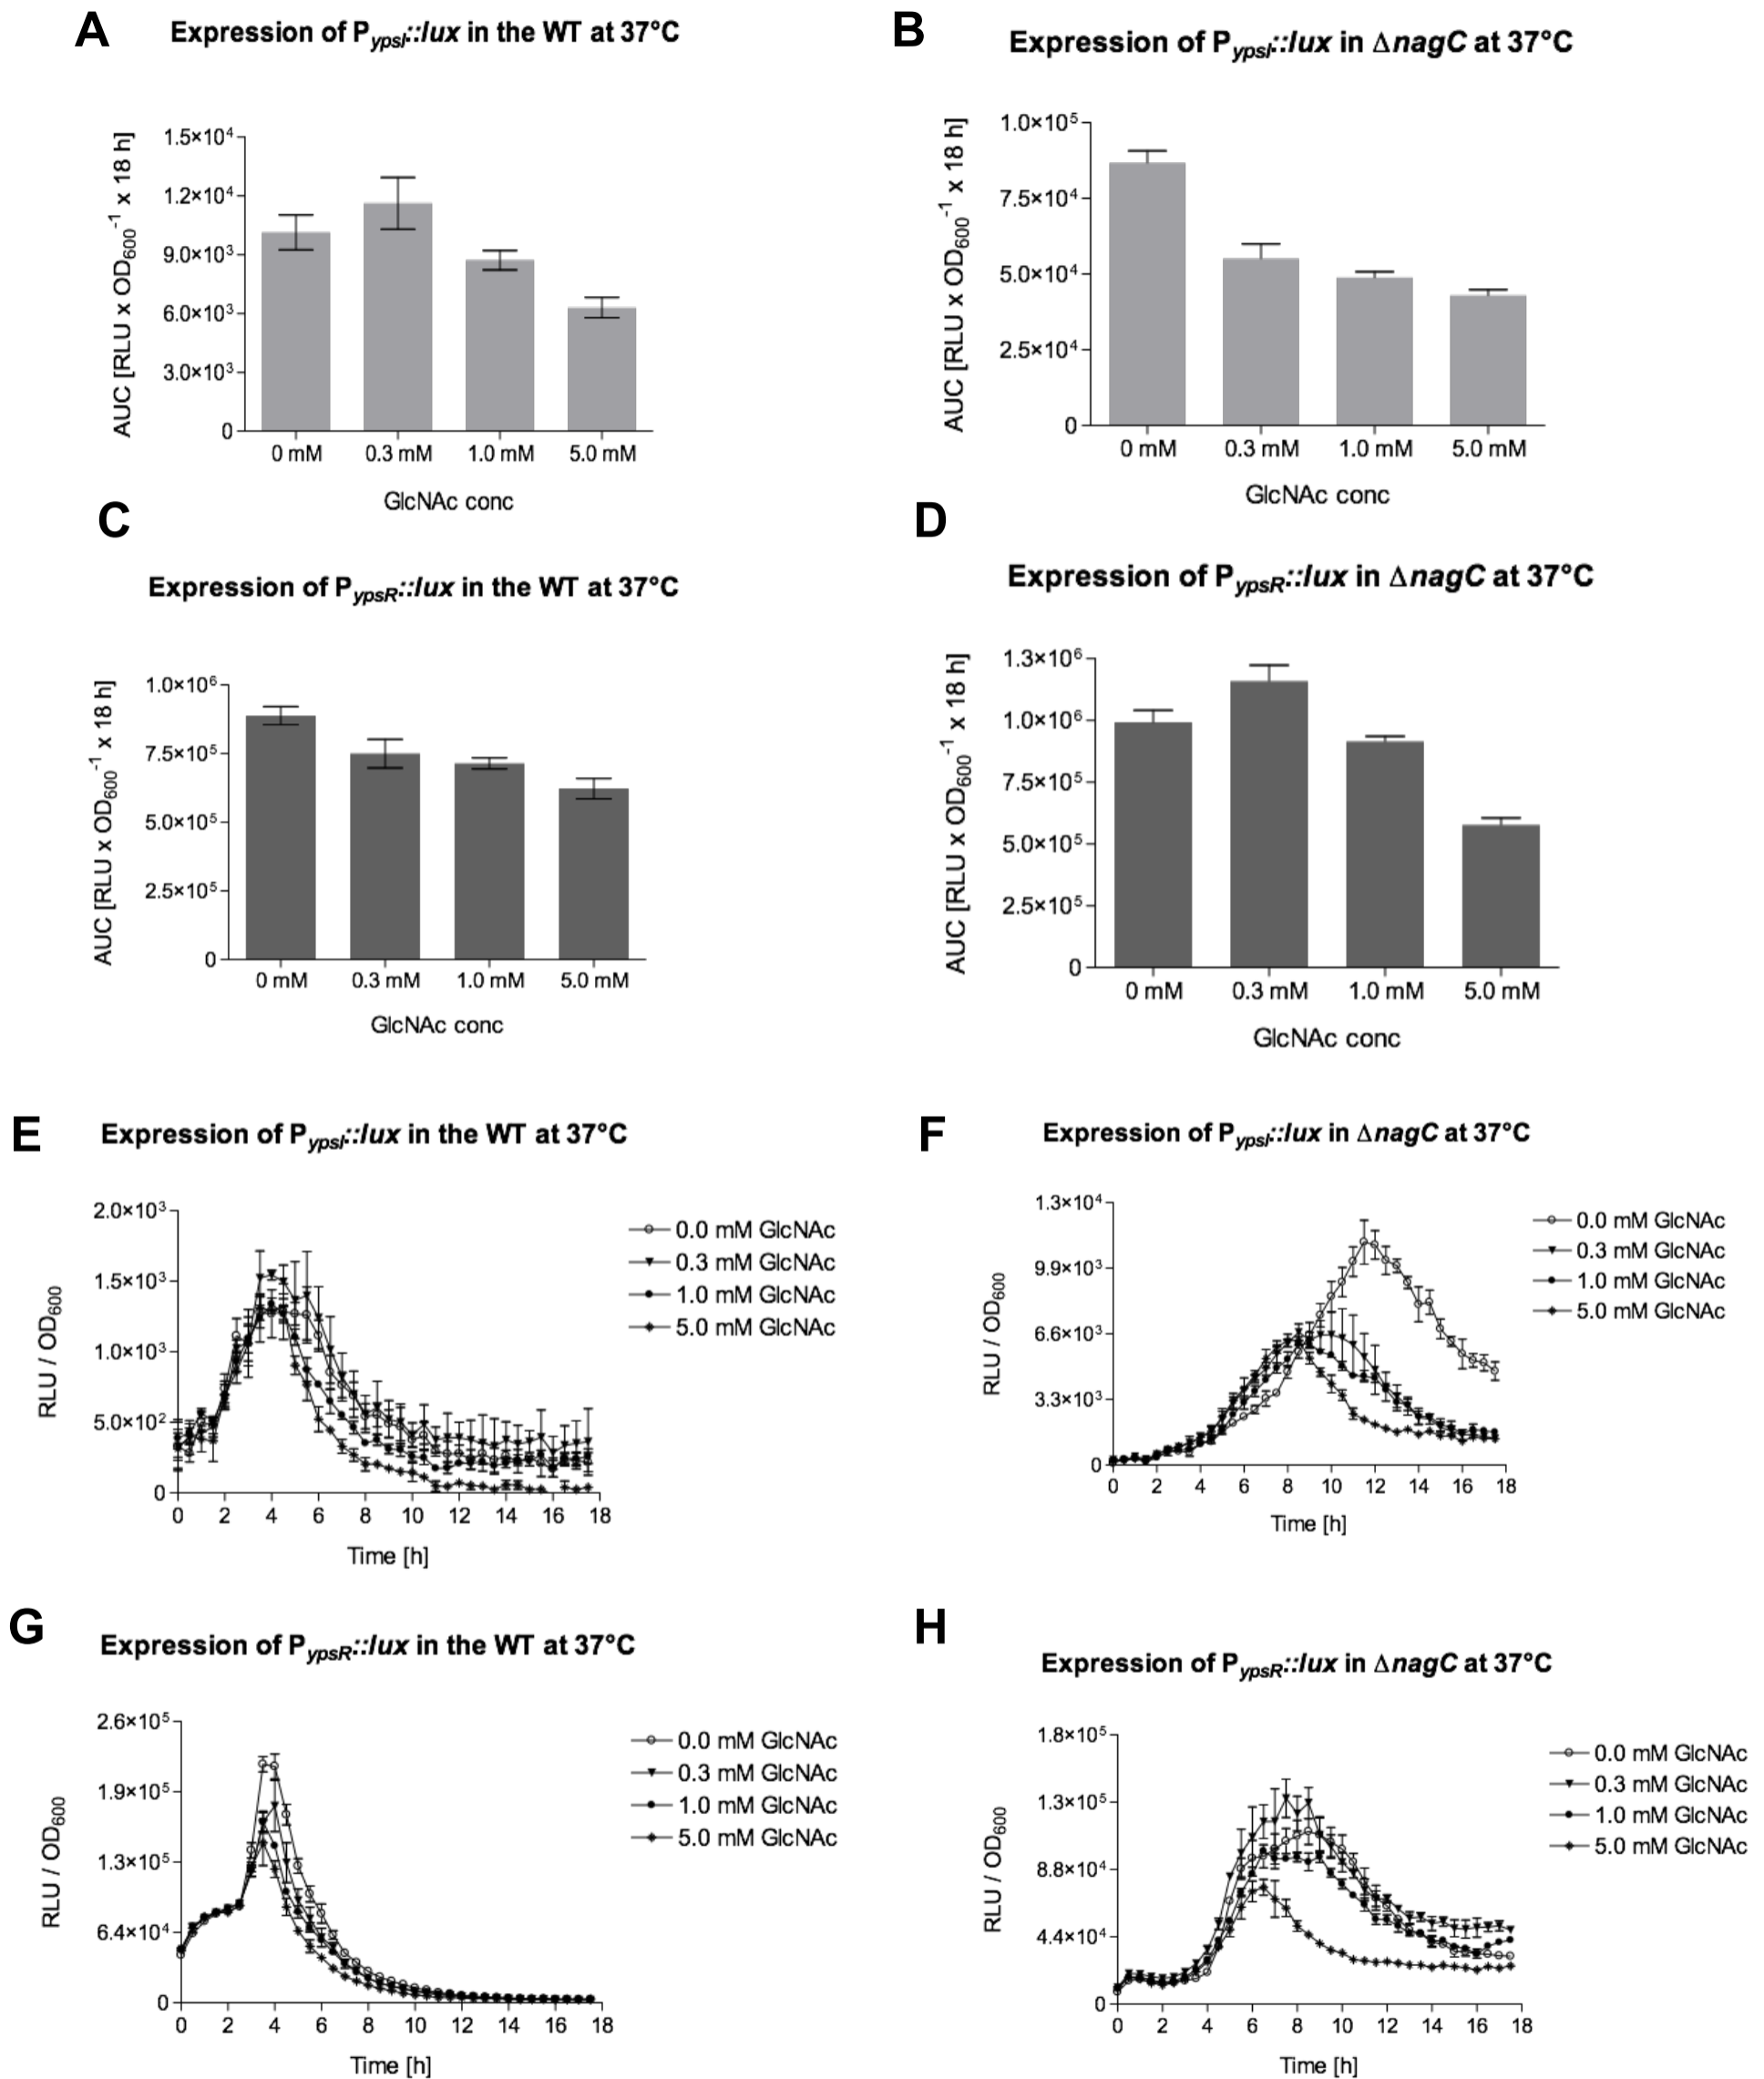

**Fig S4.** Expression as AUC of *ypsI* and *ypsR* in the parent (WT) and *nagC* mutant with increasing GlcNAc concentrations at 37°C (A-D). The full expression profiles reveal the profiles of the curves over 18 h (E-H).

**A** Expression of  $P_{ytl}::lux$  in the WT at 26°C

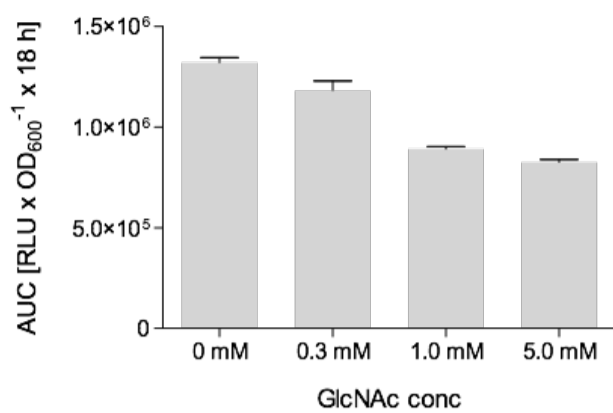

**B** Expression of  $P_{ytl}::lux$  in  $\Delta nagC$  at 26°C

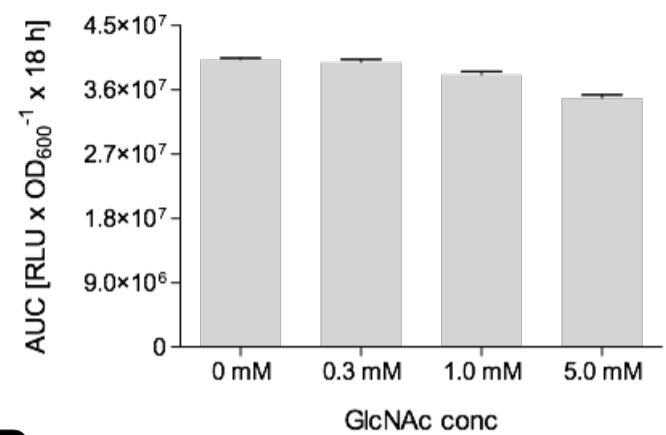

**C** Expression of  $P_{ytlR}::lux$  in the WT at 26°C

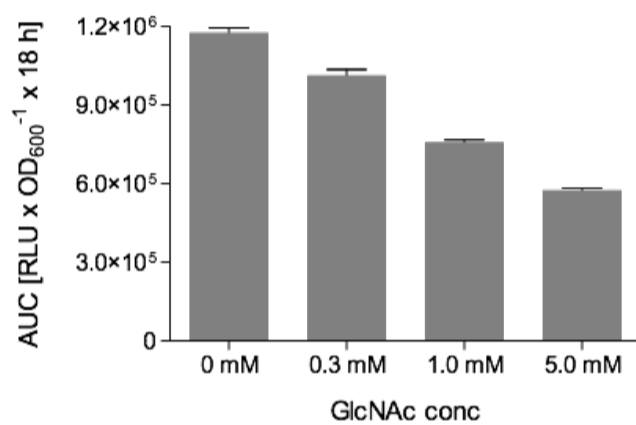

**D** Expression of  $P_{ytlR}::lux$  in  $\Delta nagC$  at 26°C

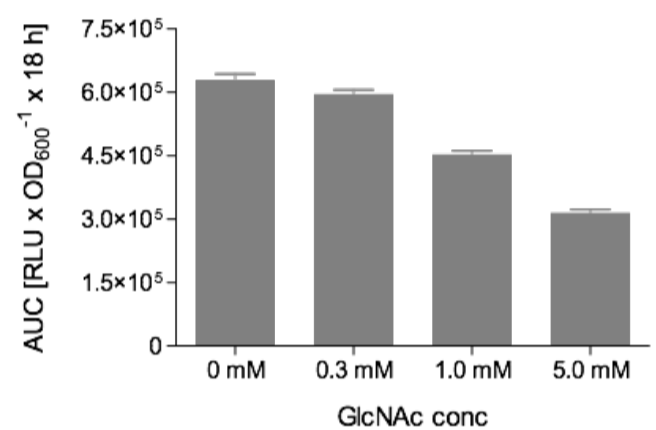

**E** Expression of  $P_{ypl}::lux$  in the WT at 26°C

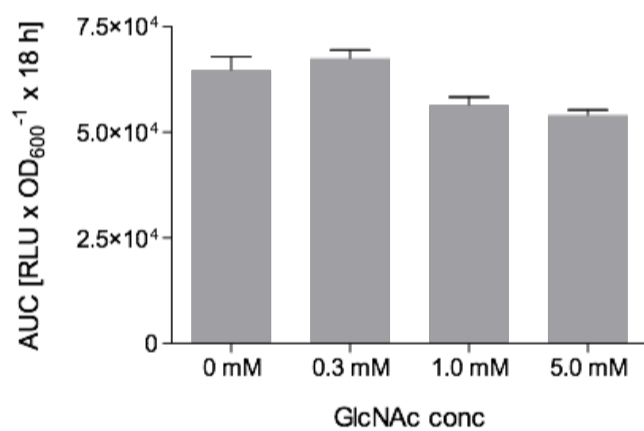

**F** Expression of  $P_{ypl}::lux$  in  $\Delta nagC$  at 26°C

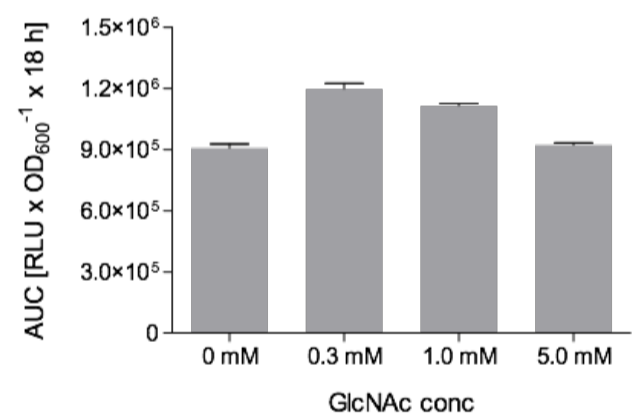

**G** Expression of  $P_{yplR}::lux$  in the WT at 26°C

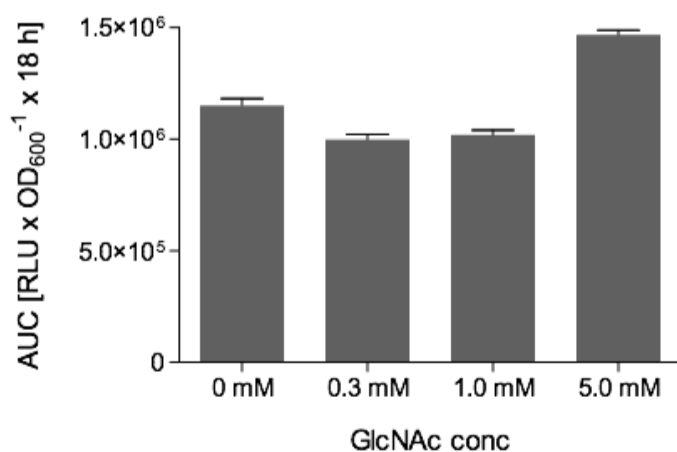

**H** Expression of  $P_{yplR}::lux$  in  $\Delta nagC$  at 26°C

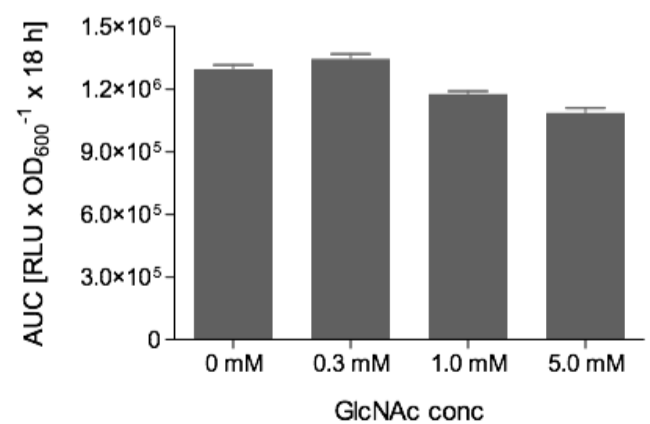

**Fig S5.** Expression as AUC of *ytl*, *ytlR*, *ypl* and *yplR* in the parent (WT) and *nagC* mutant with increasing GlcNAc concentrations at 26°C (A-H).

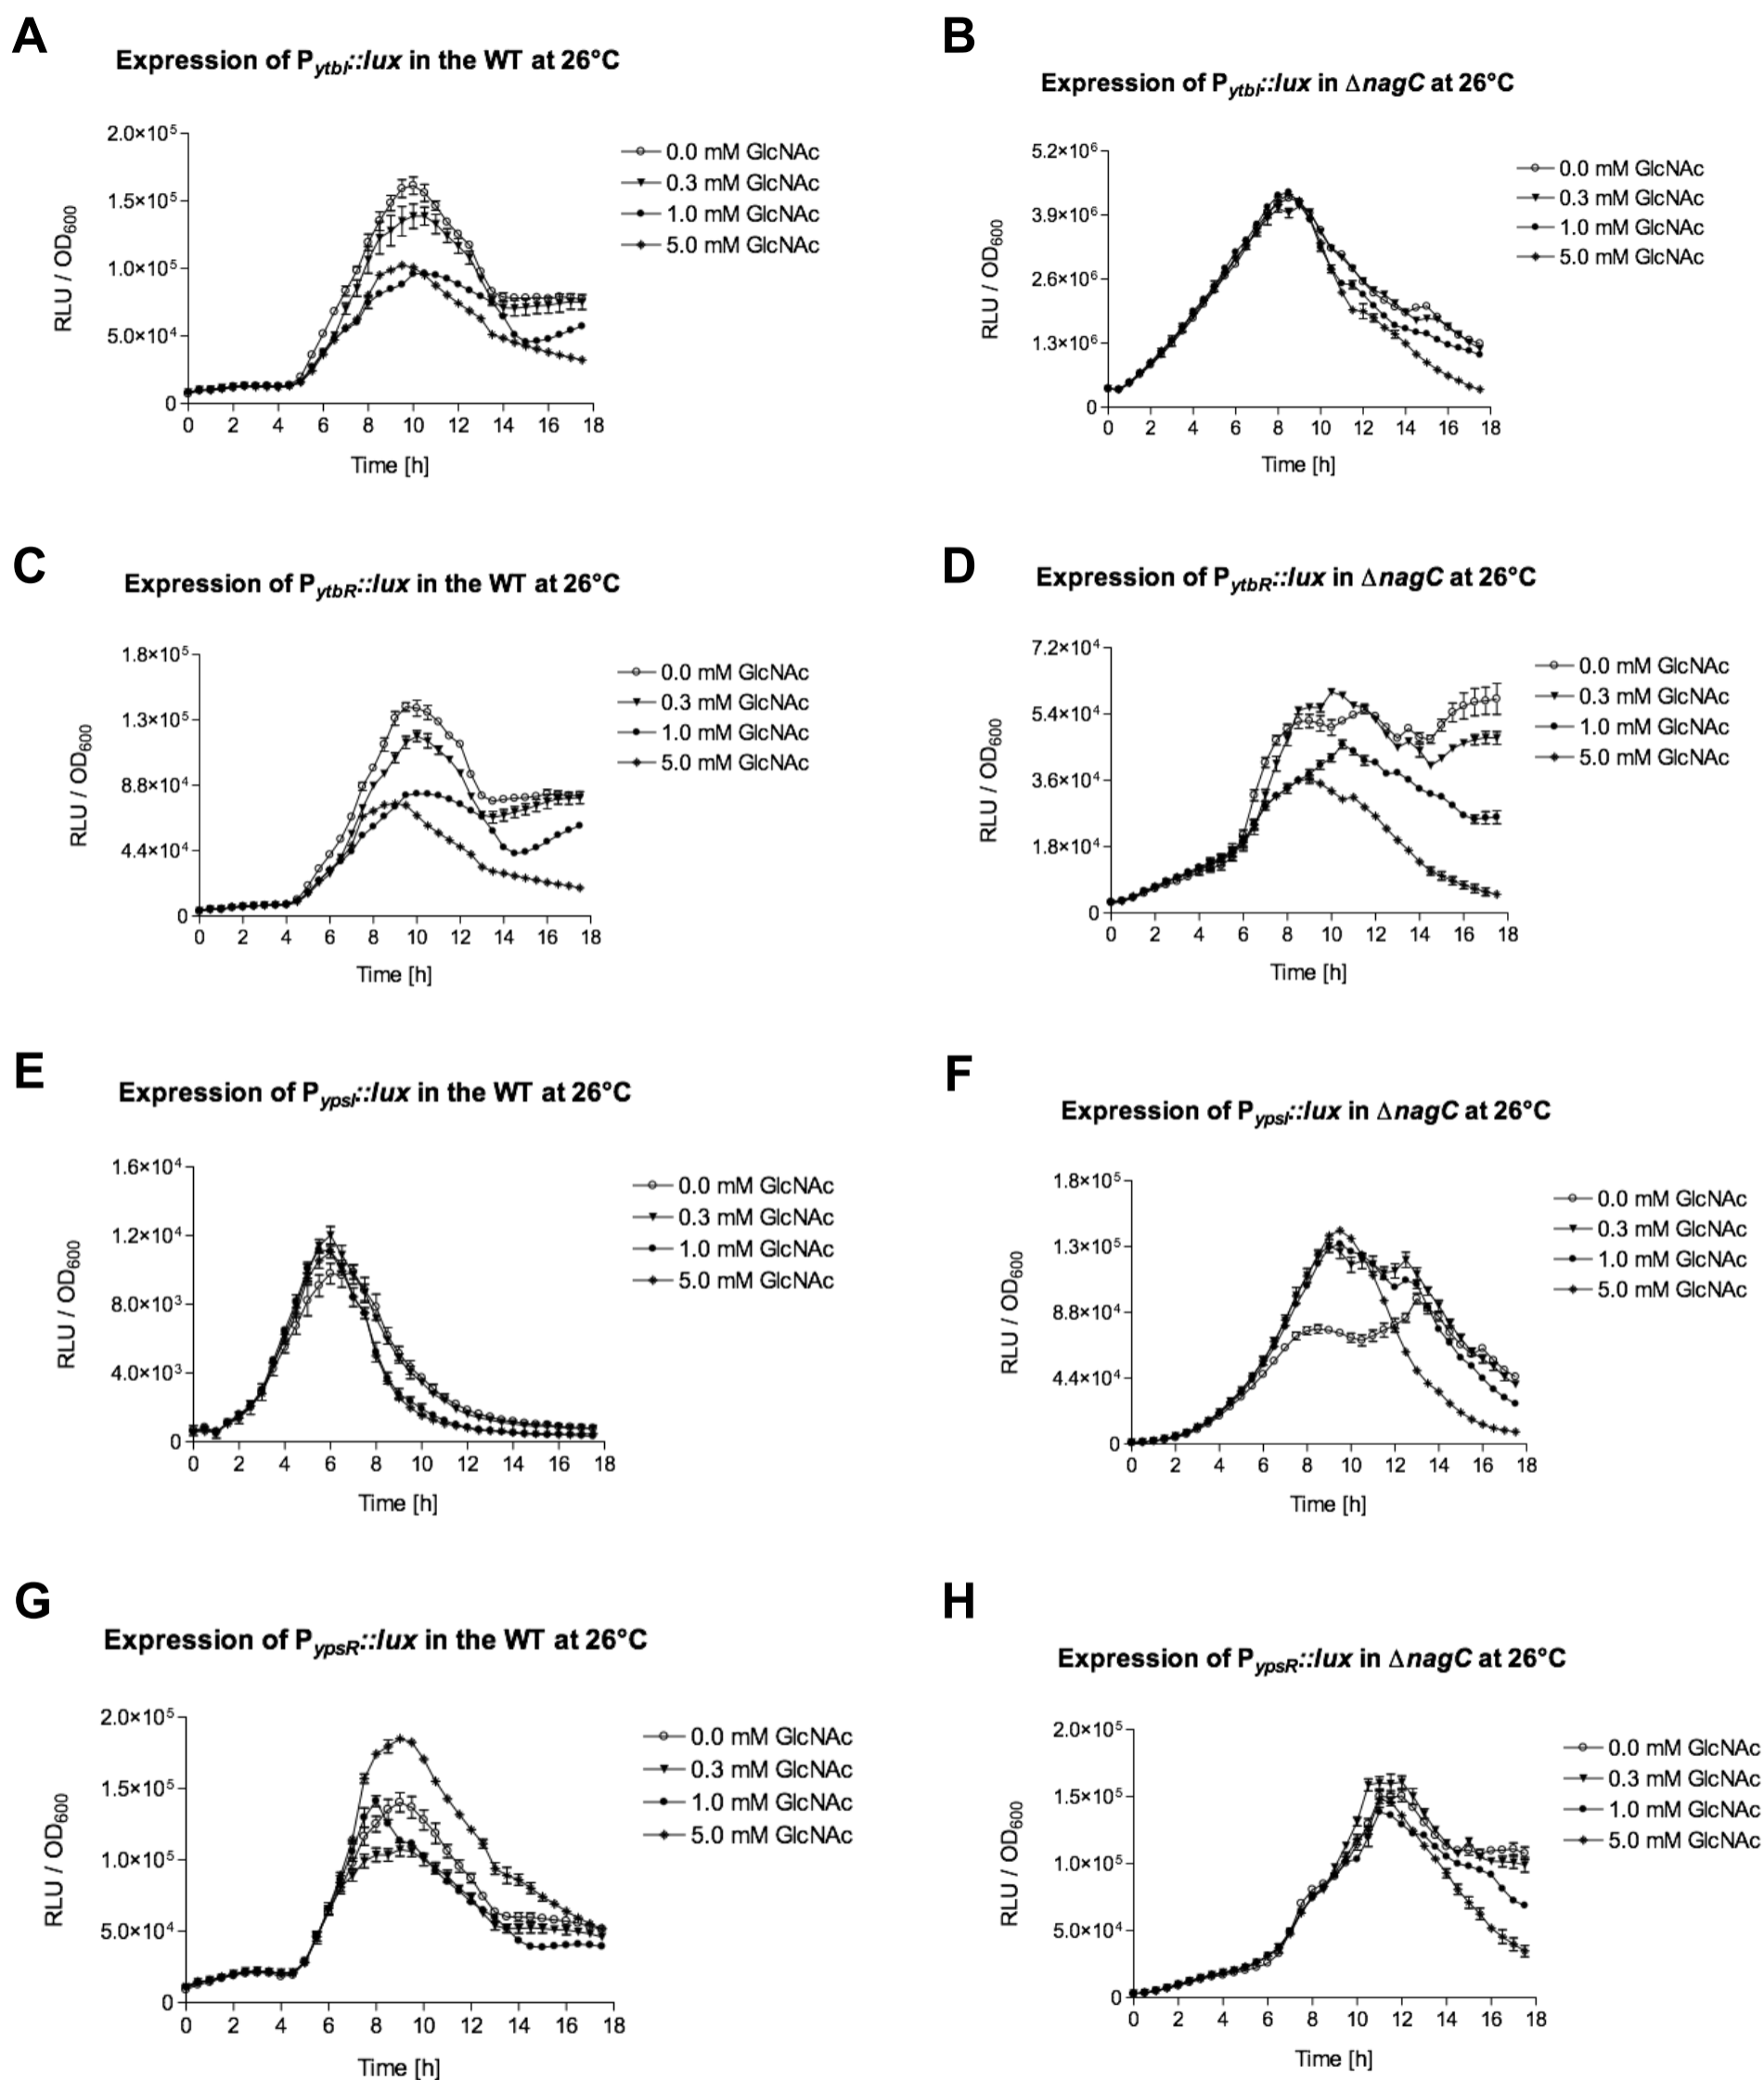

**Fig S6.** Full expression profile of *ytbI*, *ytbR*, *ypSI* and *ypSR* in the parent (WT) and *nagC* mutant with increasing GlcNAc concentrations at 26°C (A-H). Use in conjunction with Fig. S5.

### Expression of $P_{nagC}::lux$ at 37°C

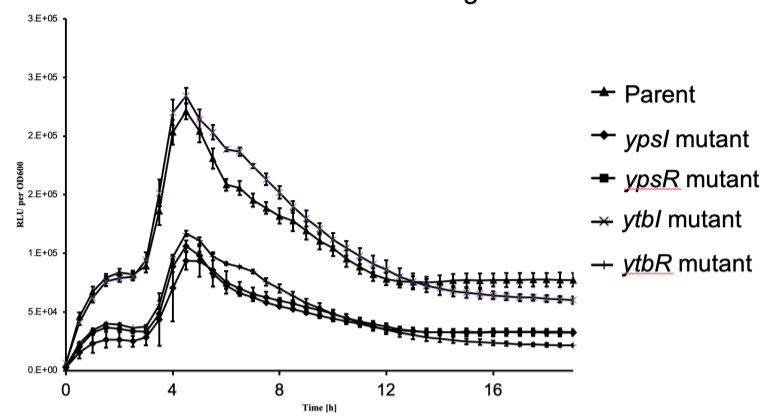

**Fig S7.** Full expression profile of *nagC* in the parent and *ytl*, *ytr*, *ypl* and *ypr* quorum sensing mutants.



**Table S1. Plasmids**

| <b>Name</b>                         | <b>Description</b>                                                                                                                            | <b>Source</b> |
|-------------------------------------|-----------------------------------------------------------------------------------------------------------------------------------------------|---------------|
| pUC4K                               | Source of kanamycin resistance cassette                                                                                                       | Pharmacia     |
| pAJD434                             | $\lambda$ -red recombinase plasmid inducible with arabinose (Tm <sup>r</sup> )                                                                | [1]           |
| pGEM-T Easy                         | Ampicillin <sup>r</sup> PCR product cloning vector                                                                                            | Promega       |
| pUC18R6KT::Tc mini Tn7              | Source of mini Tn7 transposon                                                                                                                 | [2]           |
| pTNS2                               | pUX-BF13 <i>Ori</i> ; mini-Tn7 helper plasmid, encodes TnsABC +D transposase complex to catalyze high frequency insertion (Amp <sup>r</sup> ) | [2]           |
| pDM4                                | Suicide vector containing <i>mobRK2</i> , <i>oriR6K</i> and <i>sacBR</i> (Cm <sup>r</sup> )                                                   | [3]           |
| pBlue/ <i>lux</i>                   | pBluescript II KS+ Vector containing the <i>luxCDABE</i> operon (Amp <sup>r</sup> )                                                           | [4]           |
| pHG327                              | Low copy number cloning vector (Amp <sup>r</sup> )                                                                                            | [5]           |
| pSB2020                             | Gfp vector for labelling (Amp <sup>r</sup> )                                                                                                  | [6]           |
| pHP276                              | pKNG101 suicide vector containing a promoter:: <i>lux</i> fusion of <i>ypsI</i>                                                               | [4]           |
| pHP277                              | pKNG101 suicide vector containing a promoter:: <i>lux</i> fusion of <i>ypsR</i>                                                               | [4]           |
| pHP278                              | pKNG101 suicide vector containing a promoter:: <i>lux</i> fusion of <i>ytl</i>                                                                | [4]           |
| pHP279                              | pKNG101 suicide vector containing a promoter:: <i>lux</i> fusion of <i>ytlR</i>                                                               | [4]           |
| pHG::P <sub><i>hms::lux</i></sub>   | pHG327 containing the <i>hmsHFRS</i> promoter fusion                                                                                          | This study    |
| pDM4::P <sub><i>nagC::lux</i></sub> | pDM4 Suicide vector containing a promoter:: <i>lux</i> fusion of <i>nagC</i> (Cm <sup>r</sup> )                                               | This study    |
| pAW1                                | Tn7 suicide vector containing a parental copy of <i>nagC</i> for complementation.                                                             | This study    |

- Derbise A, Lesic B, Dacheux D, Ghigo J-M, Carniel E.** A rapid and simple method for inactivating chromosomal genes in *Yersinia*. *Fems Immunology and Medical Microbiology* 2003;38(2):113 - 116.
- Choi KH, Gaynor JB, White KG, Lopez C, Bosio CM et al.** A Tn7-based broad-range bacterial cloning and expression system. *Nat Methods* 2005;2(6):443-448.
- O'Toole R, Milton DL, Wolf-Watz H.** Chemotactic motility is required for invasion of the host by the fish pathogen *Vibrio anguillarum*. *MolMicrobiol* 1996;19(3):625 - 637.
- Atkinson S, Chang CY, Patrick HL, Buckley CMF, Wang Y et al.** Functional interplay between the *Yersinia pseudotuberculosis* YpsRI and YtbRI quorum sensing systems modulates swimming motility by controlling expression of *flhDC* and *fliA*. *MolMicrobiol* 2008;69(1):137-151.
- Stewart GSAB, Lubinskymink S, Jackson CG, Cassel A, Kuhn J.** pHG165 - a pBR322 copy number derivative of pUC8 for cloning and expression. *Plasmid PMID - 3012611* 1986;15(3):172 - 181.
- Qazi SN, Rees CE, Mellits KH, Hill PJ.** Development of gfp Vectors for Expression in *Listeria monocytogenes* and Other Low G+C Gram Positive Bacteria. *Microb Ecol* 2001;41(4):301-309.

**Table S2. Primers**

| <b>Name</b>         | <b>Sequence (5'-3')</b>                                                             | <b>Restriction Site</b> | <b>Source</b> |
|---------------------|-------------------------------------------------------------------------------------|-------------------------|---------------|
| <i>nagC</i> -ko-F   | GGCGGACAAGCACAAATTGGTA<br>ACGTGGATCTGGTAAAACA<br>CAAGGAGAAAGCCACG<br>TTGTGTCTCAA    |                         | This study    |
| <i>nagC</i> -ko-R   | AGTTTCTAGCAAACGTTGCAGC<br>AAGACACCATTGAGCATAGCGC<br>GCTTAGCTTAGAAAACTCATC<br>GAGCAT |                         | This study    |
| <i>nagC</i> -comp-F | <b><u>CTCGAG</u></b> CGGTATCCGATTTGCG<br>ACC                                        | XhoI                    | This study    |
| <i>nagC</i> -comp-R | <b><u>GGATCC</u></b> GGTCACTATAACATGG<br>CTGTGG                                     | BamHI                   | This study    |
| <i>nagC</i> -lux-F  | <b><u>CTCGAG</u></b> CGGTATCCGATTTGCG<br>ACC                                        | XhoI                    | This study    |
| <i>nagC</i> -lux-R  | <b><u>GGATCCGGTACCC</u></b> CTCGTTGCC<br>ATTAACGATGG                                | KpnI, BamHI             | This study    |
| VG-Phms-F2-ApaI     | ATTTCT <b><u>GGGCC</u></b> TTTCATTGTATCGT<br>AGCCCGGATAAAAC                         | ApaI                    | This study    |
| VG-Phms-R-XhoI      | GCGTTAT <b><u>CTCGAG</u></b> TATAACC<br>CTTAAGCCAGCAACTTGTTT<br>GA                  | XhoI                    | This study    |
